# Supplementary material for: Elucidating the Structure, Dynamics, and Interaction of a Choline Chloride and Citric Acid Based Eutectic System by Spectroscopic and Molecular Modeling Investigations
Source: PubMed Central journal article supplement (PMC10586180; doi:10.1021/acsomega.3c04570), 2023-10-04
Supplement: ao3c04570_si_001.pdf [file ao3c04570_si_001.pdf]

**Elucidating Structure, Dynamics, and Interaction of Choline Chloride and Citric Acid Based Eutectic System by Spectroscopic and Molecular Modelling Investigations**

Md Ackas Ali<sup>a</sup>, Md Abdul Kaium<sup>b</sup>, Sayed Nesar Uddin<sup>b</sup>, Md Jaish Uddin<sup>b</sup>, Oluseyi Olawuyi<sup>a</sup>, Albert D. Campbell Jr.<sup>a</sup>, Carl Jacky Saint-Louis<sup>a</sup>, Mohammad A. Halim<sup>a\*</sup>

<sup>a</sup>Department of Chemistry and Biochemistry, Kennesaw State University, Kennesaw, GA, 30144 USA

<sup>b</sup>Division of Quantum Chemistry, The Red-Green Research Center, BICCB, 16, Tejkunipara, Tejgaon, Dhaka 1215, Bangladesh

\*Corresponding Author: Mohammad A. Halim, Email: [mhalim1@kennesaw.edu](mailto:mhalim1@kennesaw.edu); Phone: Phone: 470-578-6759.

**Supporting Information (SI)**

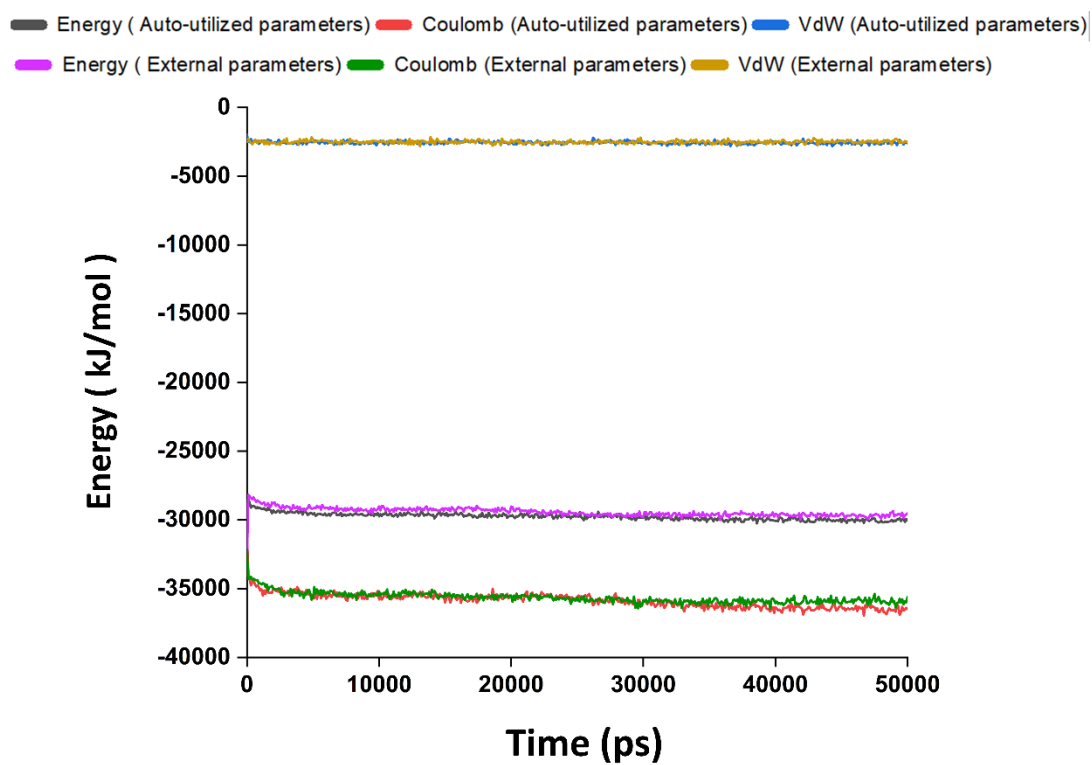

**Figure S1:** Comparison between YASARA auto-utilized and external Autosmiles Gaff2 forcefield parameters in MD simulation in terms of energetic terms.

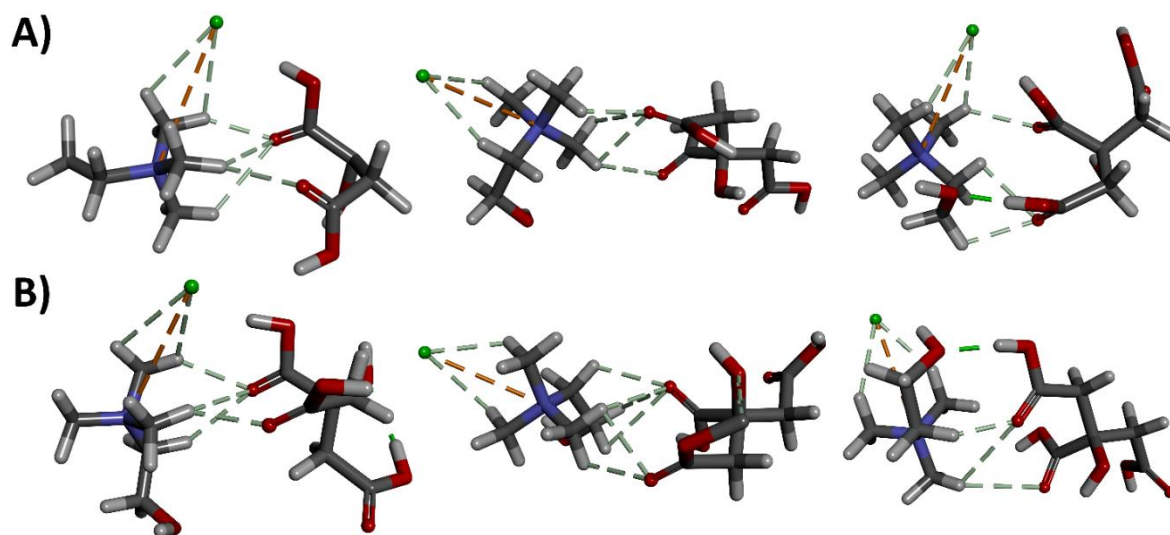

**Figure S2:** Comparative interactions analysis between (A) YASARA auto-utilized and (B) external Autosmiles Gaff2 forcefield parameters in MD simulation.

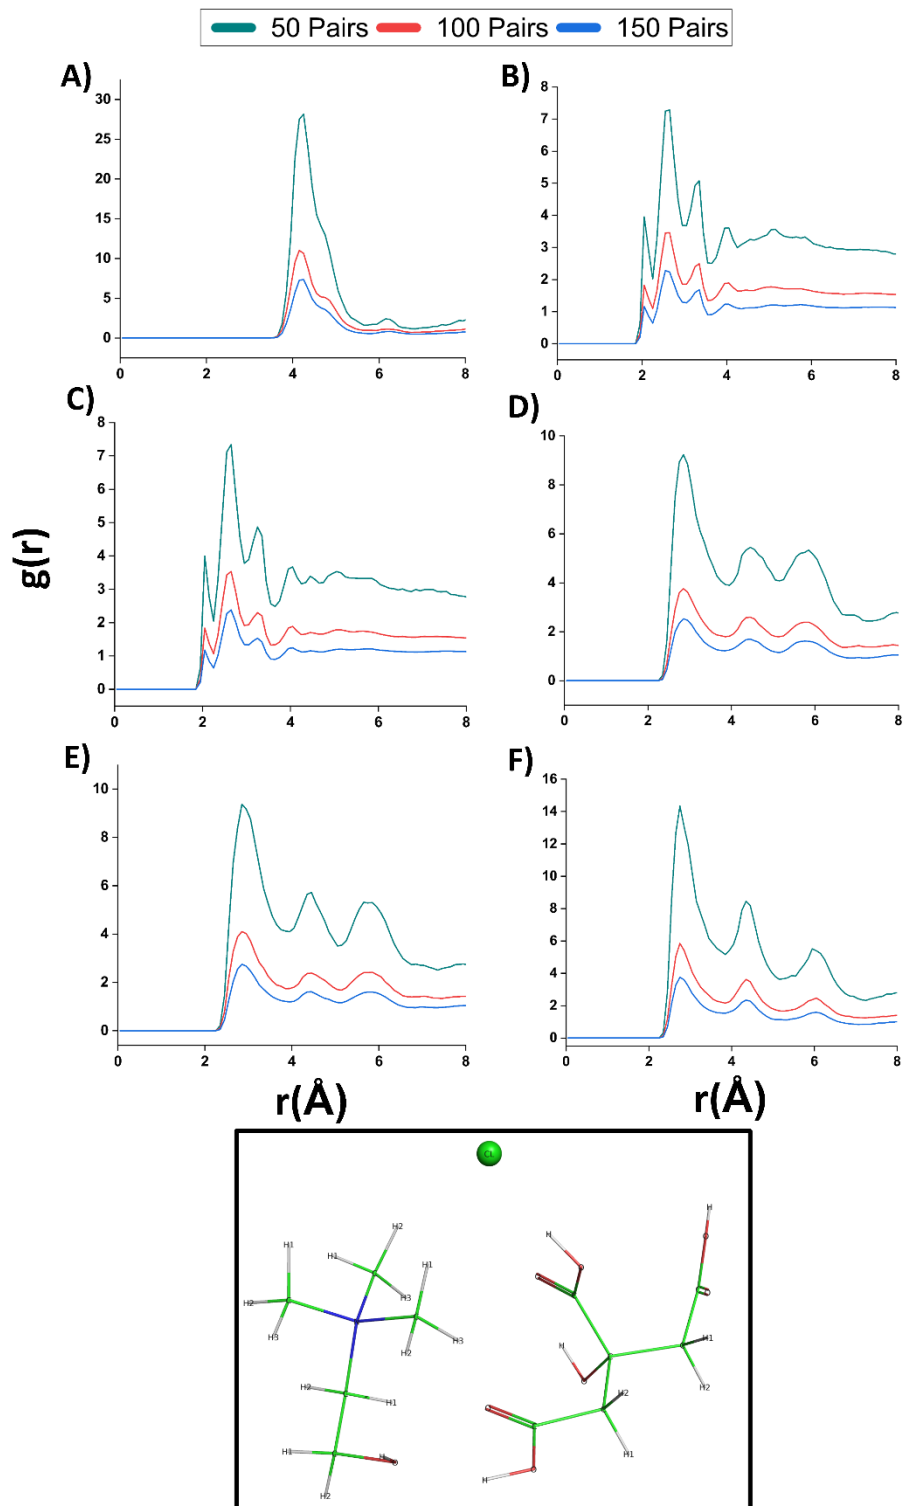

**Figure S3:** RDF diagrams of des systems between different atom pairs. (A) N [CH] – CL, (B) H1 [CH] – O [CA], (C) H2 [CH] -O [CA], (D) H1 [CH] -CL, (E) H2 [CH] -CL and (F) H3 [CH] – CL. {CA\* Citric Acid , CH\* Choline }

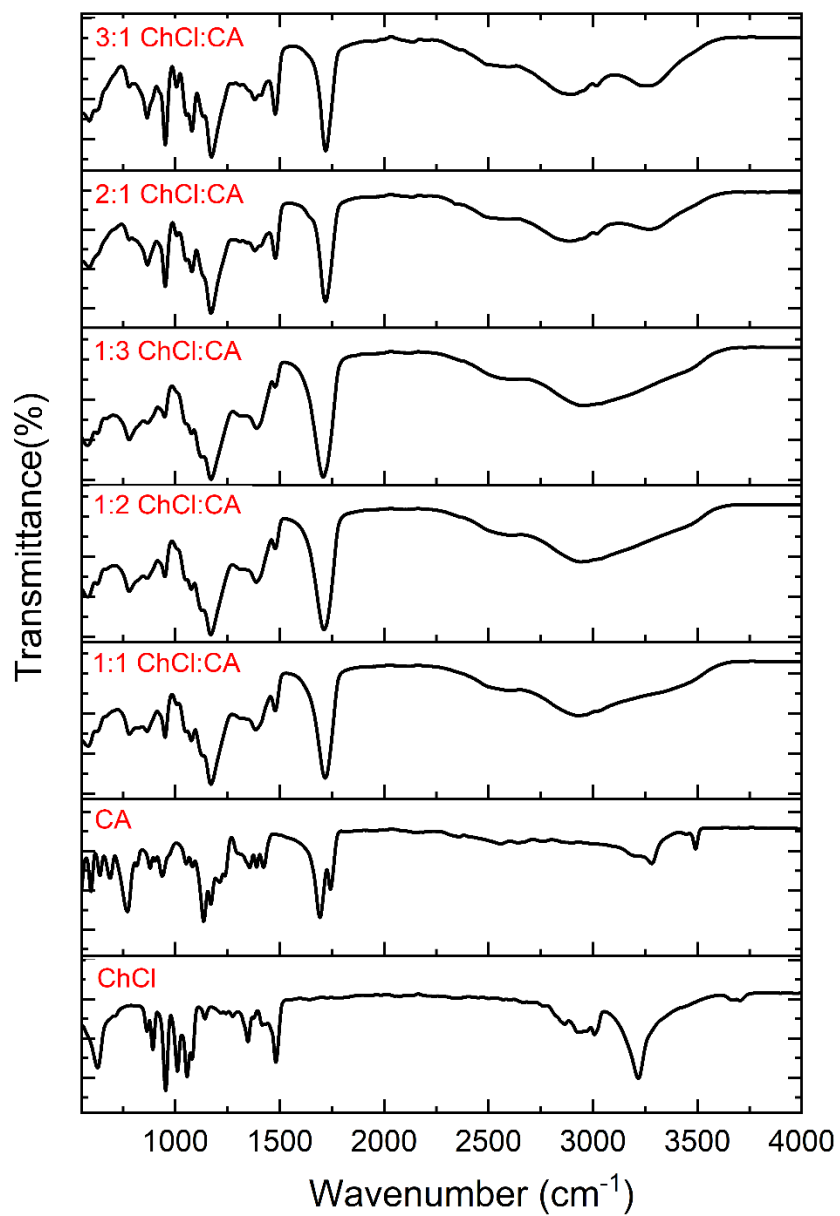

**Figure S4:** The IR Spectrum of ChCl, CA, and 5 different ratios of ChCl and CA and the different ratio DESs (1:1 ChCl: CA, 1:2 ChCl: CA, 1:3 ChCl: CA, 2:1 ChCl: CA, 3:1 ChCl: CA).

## List of Supporting Tables

**Table S1:** The Single Point Energy (SPE) calculations for all 14 conformers to identify the best possible conformers for further study. All 6 conformers with negative energy were subsequently considered for quantum calculations in the DFT-wB97XD/6-311G++ (d,p) level of theory. (H = Hartree unit)

| Name              | Energy(H) SPE | Energy(H) SPE (CA) | Energy(H) SPE (ChCl) | Energy(H) diff. | Energy(kj) diff. |
|-------------------|---------------|--------------------|----------------------|-----------------|------------------|
| 50 pairs00500.1   | -1542.192518  | -755.944789        | -786.240093          | -0.007636       | -20.04831953     |
| 50 pairs00500.1.1 | -1542.169942  | -755.940858        | -786.217366          | -0.011718       | -30.76561134     |
| 50pairs00500.1.2  | -1542.146907  | -755.945137        | -786.209872          | 0.008102        | 21.2718026       |
|                   |               |                    |                      | 0               |                  |
| 50 pairs00500.2   | -1542.201541  | -755.951944        | -786.238656          | -0.010941       | -28.72559769     |
| 50 pairs00500.2.1 | -1542.17619   | -755.95167         | -786.185456          | -0.039064       | -102.5625398     |
|                   |               |                    |                      | 0               |                  |
| 50 pairs00500.3   | -1542.18913   | -755.945393        | -786.245487          | 0.00175         | 4.5946254        |
| 50 pairs00500.3.1 | -1542.196081  | -755.951975        | -786.230171          | -0.013935       | -36.58634529     |
| 50 pairs00500.3.2 | -1542.139743  | -755.945157        | -786.199121          | 0.004535        | 11.9066434       |
|                   |               |                    |                      | 0               |                  |
| 50 pairs00500.4   | -1542.192454  | -755.952311        | -786.240046          | -0.000097       | -0.254673519     |
| 50 pairs00500.5   | -1542.18581   | -755.947186        | -786.240995          | 0.002371        | 6.22506097       |
| 50 pairs00500.5.1 | -1542.192753  | -755.951582        | -786.23641           | -0.004761       | -12.50000645     |
|                   |               |                    |                      | 0               |                  |
| 50 pairs00500.6   | -1542.171     | -755.945252        | -786.229689          | 0.003941        | 10.3470963       |
| 50 pairs00500.6.1 | -1542.179087  | -755.945399        | -786.239981          | 0.006293        | 16.5222728       |
| 50 pairs00500.6.2 | -1542.170425  | -755.940683        | -786.230766          | 0.001024        | 2.6885122        |

**Table S2.** IR in frequencies of choline chloride (ChCl), citric acid (CA), and Six cluster conformers (A, B,

| ChCl                                                  |                         | CA                                                                                      |                         | Conformer A                       |                         | Conformer B                                 |                         | Conformer C                                 |                         | Conformer D                                 |                         |
|-------------------------------------------------------|-------------------------|-----------------------------------------------------------------------------------------|-------------------------|-----------------------------------|-------------------------|---------------------------------------------|-------------------------|---------------------------------------------|-------------------------|---------------------------------------------|-------------------------|
| A <sup>bonds</sup>                                    | Fre (cm <sup>-1</sup> ) | A <sup>bonds</sup>                                                                      | Fre (cm <sup>-1</sup> ) | A <sup>bonds</sup>                | Fre (cm <sup>-1</sup> ) | A <sup>bonds</sup>                          | Fre (cm <sup>-1</sup> ) | A <sup>bonds</sup>                          | Fre (cm <sup>-1</sup> ) | A <sup>bonds</sup>                          | Fre (cm <sup>-1</sup> ) |
| O(7)-H(22) bending                                    | 215                     | C(10)-H <sub>2</sub> twst.<br>/O(1)-H(18) roc<br>/O(2)-H(19) roc<br>/O(5)-H(21) roc.    | 1112                    | C(33)-O(25) str. /<br>O(24)-H(41) | 1708                    | C(33)-O(25) str. /<br>O(24)-H(41) (CA)      | 1710                    | C(33)-O(25) str. /<br>O(24)-H(41) (CA)      | 1790                    | C(33)-O(25) str. /<br>O(24)-H(41) (CA)      | 1754                    |
| CH <sub>3</sub> symm. str.                            | 2863                    | C(13)=O(7) str. /<br>O(5)-H(21)                                                         | 1789                    | C(34)=O(28) str. /<br>roc. (CA)   | 1764                    | C(34)=O(28) str. /<br>O(26)-H(42) roc. (CA) | 1767                    | C(34)=O(28) str. /<br>O(26)-H(42) roc. (CA) | 1753                    | C(34)=O(28) str. /<br>O(26)-H(42) roc. (CA) | 1783                    |
| CH <sub>2</sub> asy. Str.                             | 3007                    | C(12)=O(6) str. /<br>O(4)-H(20) roc.                                                    | 1775                    | C(35)=O(29) str. /<br>roc. (CA)   | 1782                    | C(35)=O(29) str. /<br>O(27)-H(43) roc. (CA) | 1863                    | C(35)=O(29) str. /<br>O(27)-H(43) roc. (CA) | 1737                    | C(35)=O(29) str. /<br>O(27)-H(43) roc. (CA) | 1733                    |
| O(7)-H(22) str.                                       | 3747                    |                                                                                         |                         | O(24)-H(41) str. (CA)             | 2628                    | O(24)-H(41) str. (CA)                       | 1782                    | O(27)-H(43) str. (CA)                       | 2775                    | O(27)-H(43) str. (CA)                       | 3180                    |
|                                                       |                         |                                                                                         |                         | O(7)-H(22) str. (ChCl)            | 3347                    | O(7)-H(22) str. (ChCl)                      | 3693                    | O(26)-H(42) str. (CA)                       | 3667                    | O(24)-H(41) str. (CA)                       | 3380                    |
|                                                       |                         |                                                                                         |                         | O(23)-H(40) str.(CA)              | 3605                    | O(23)-H(40) str. (CA)                       | 3615                    | O(23)-H(40) (CA)                            | 3643                    | O(23)-H(40) (CA)                            | 3628                    |
|                                                       |                         |                                                                                         |                         | O(27)-H(43) COOH str. (CA)        | 3682                    |                                             |                         | O(24)-H(41) str. (CA)                       |                         | O(26)-H(42) (CA)                            | 3694                    |
|                                                       |                         |                                                                                         |                         |                                   |                         |                                             |                         |                                             |                         | O(7)-H(21) str. (CA)                        | 3759                    |
|                                                       |                         |                                                                                         |                         |                                   |                         |                                             |                         |                                             |                         |                                             |                         |
| <b>Conformer E</b>                                    |                         | <b>Conformer F</b>                                                                      |                         |                                   |                         |                                             |                         |                                             |                         |                                             |                         |
| A <sup>bonds</sup>                                    | Fre (cm <sup>-1</sup> ) | A <sup>bonds</sup>                                                                      | Fre (cm <sup>-1</sup> ) |                                   |                         |                                             |                         |                                             |                         |                                             |                         |
| C(33)-O(25) str. /<br>O(24)-H(41) roc. (CA)           | 1791                    | C(33)-O(25) str. /<br>O(24)-H(41) roc. /<br>C(35)=O(29) str. /<br>O(27)-H(43) roc. (CA) | 1729-1747               |                                   |                         |                                             |                         |                                             |                         |                                             |                         |
| C(34)=O(28) str. /<br>O(26)-H(42) roc. (CA)           | 1732                    | C(34)=O(28) str /<br>O(26)-H(42) roc. (CA)                                              | 1776                    |                                   |                         |                                             |                         |                                             |                         |                                             |                         |
| C(35)=O(29) str. /<br>O(27)-H(43) roc. (CA)           | 1754                    | O(24)-H(41) str.                                                                        | 2665                    |                                   |                         |                                             |                         |                                             |                         |                                             |                         |
| C(31)-H(37) str. (CA)                                 | 2828                    | O(8)-H(22) str. (ChCl)                                                                  | 3612                    |                                   |                         |                                             |                         |                                             |                         |                                             |                         |
| CH <sub>3</sub> symm. str. (ChCl)                     | 2898                    |                                                                                         |                         |                                   |                         |                                             |                         |                                             |                         |                                             |                         |
| CH <sub>2</sub> symm. str. (ChCl)                     | 2934                    |                                                                                         |                         |                                   |                         |                                             |                         |                                             |                         |                                             |                         |
| O-H <sub>COOH</sub> roc<br>/CH <sub>2</sub> tws. (CA) | 1070                    |                                                                                         |                         |                                   |                         |                                             |                         |                                             |                         |                                             |                         |
| CH <sub>2</sub> asymm. str. (ChCl)                    | 3017                    |                                                                                         |                         |                                   |                         |                                             |                         |                                             |                         |                                             |                         |
| O(7)-H(22) str. (ChCl)                                | 3584                    |                                                                                         |                         |                                   |                         |                                             |                         |                                             |                         |                                             |                         |
| O(23)-H(40) str. (CA)                                 | 3606                    |                                                                                         |                         |                                   |                         |                                             |                         |                                             |                         |                                             |                         |
| O(27)-H(43) str.(CA)                                  | 3671                    |                                                                                         |                         |                                   |                         |                                             |                         |                                             |                         |                                             |                         |
| O(24)-H(41) str.(CA)                                  | 3682                    |                                                                                         |                         |                                   |                         |                                             |                         |                                             |                         |                                             |                         |

C, D, E, and F) of 1:1 ChCl: CA in DESs system in the DFT-wB97XD/6-311G++ (d,p) level of theory.

**Table S3:** Raman shifts of ChCl, CA, and Six cluster conformers (A, B, C, D, E, and F) of 1:1 ChCl: CA in DESs in the DFT-wB97XD/6-311G++ (d,p) level of theory.

| ChCl                                      |                         | CA                                                       |                         | Conformer A                                                                                                       |                         | Conformer B                                                   |                         | Conformer C                                              |                         | Conformer D                                                |                         |
|-------------------------------------------|-------------------------|----------------------------------------------------------|-------------------------|-------------------------------------------------------------------------------------------------------------------|-------------------------|---------------------------------------------------------------|-------------------------|----------------------------------------------------------|-------------------------|------------------------------------------------------------|-------------------------|
| A bonds                                   | Fre (cm <sup>-1</sup> ) | A bonds                                                  | Fre (cm <sup>-1</sup> ) | A bonds                                                                                                           | Fre (cm <sup>-1</sup> ) | A bonds                                                       | Fre (cm <sup>-1</sup> ) | A bonds                                                  | Fre (cm <sup>-1</sup> ) | A bonds                                                    | Fre (cm <sup>-1</sup> ) |
| O(7)-H(22) str.                           | 3747                    | C(11)=O /C(12)=Ostr. O(2)-H roc. O(4)-H roc.(COOH)       | 1791                    | O(24)-H(41) str. (CA)                                                                                             | 2628                    | O(24)-H(41)                                                   | 2691                    | O(27)-H(43) str. (CA)                                    | 2775                    | C(3)-H <sub>2</sub> sym. str. (ChCl)                       | 2909                    |
| CH <sub>3</sub> symm. str.                | 2898                    | C(10)-H <sub>2</sub> sym./ C(9)-H <sub>2</sub> sym. Str. | 2959                    | C(3)-H <sub>2</sub> sym. Str.                                                                                     | 2899                    | C(3)-H <sub>2</sub> str.                                      | 2915                    | C(1)-H <sub>2</sub> str. C(6)-H <sub>3</sub> str. (ChCl) | 2944                    | C(5)-H <sub>3</sub> / C(1)-H <sub>2</sub> sym. Str. (ChCl) | 2942                    |
| C(3)-H <sub>2</sub> asy. Str.             | 2910                    | C(9)-H <sub>2</sub> asym. Str                            | 3009                    | C(1)-H <sub>2</sub> str. / C(6)-H <sub>3</sub> str. /C(4)-H <sub>3</sub> str ./C(3)-H <sub>2</sub> asy. Str. (CA) | 2954                    | C(5)-H <sub>3</sub> sym. Str./C(1)-H <sub>2</sub> str. (ChCl) | 2955                    | C(32)-H <sub>2</sub> asy. Str. (CA)                      | 3025                    | C(5)-H <sub>3</sub> sym. Str. (ChCl)                       | 2951                    |
| C(1)-H <sub>2</sub> sym. Str.             | 2944                    | C(10)-H <sub>2</sub> asym. Str                           | 3023                    | C(5)-H <sub>3</sub> sym. Str. (ChCl)                                                                              | 2971                    | C(32)-H <sub>2</sub> asy. Str.                                | 3017                    | C(4)-H /C(6)-H asy. Str.                                 | 3058                    | C(4)-H <sub>3</sub> sym. Str. (ChCl)                       | 2974                    |
| C(4)-H <sub>3</sub> / C(4)-H <sub>2</sub> | 3005                    | O(4)-H(20) <sub>COOH</sub>                               | 3669                    | C(32)-H <sub>2</sub> asym. Str.                                                                                   | 3018                    | C(4)-H <sub>2</sub> /C(5)-H <sub>2</sub> asy. Str.            | 3038                    | O(23)-H(40) <sub>COOH</sub> str. (CA)                    | 3643                    | O(27)-H(43) str. (CA)                                      | 3180                    |
|                                           |                         | O(2)-H(19) <sub>COOH</sub> / O(5)-H(21) <sub>COOH</sub>  | 3680                    | O(7)-H(22) str. (CA)                                                                                              | 3347                    | C(6)-H <sub>2</sub> / C(4)-H <sub>2</sub> asy.                | 3043                    | O(26)-H(42) <sub>COOH</sub> str. (CA)                    | 3667                    | O(24)-H(41) str. (CA)                                      | 3380                    |
|                                           |                         |                                                          |                         | O(27)-H(43) str. (CA)                                                                                             | 3682                    | O(26)-H(42) <sub>COOH</sub> str. (CA)                         | 3673                    | O(24)-H(41) <sub>COOH</sub> str. (CA)                    | 3675                    | O(23)-H(40) str. (CA)                                      | 3628                    |
|                                           |                         |                                                          |                         | O(26)-H(41) str. (CA)                                                                                             | 3676                    | O(27)-H(43) str. (CA)                                         | 3681                    | O(7)-H(22) str. (CA)                                     | 3747                    | O(26)-H(42) str. (CA)                                      | 3674                    |
|                                           |                         |                                                          |                         |                                                                                                                   |                         |                                                               |                         |                                                          |                         | O(7)-H(21) str. (ChCl)                                     | 3759                    |

| Conformer E                     |                         | Conformer F                                                  |      |
|---------------------------------|-------------------------|--------------------------------------------------------------|------|
| A bonds                         | Fre (cm <sup>-1</sup> ) |                                                              |      |
| C(31)-H <sub>2</sub> sym. Str.  | 2828                    | O(24)-H(41) str. (CA)                                        | 2665 |
| C(1)-H <sub>2</sub> str. (ChCl) | 2953                    | C(5)-H <sub>3</sub> sym. Str./ C(6)-H <sub>3</sub> sym. Str. | 2950 |
| C(5)-H <sub>3</sub> str. (ChCl) | 2915                    | O(8)-H(22) str. (ChCl)                                       | 3612 |
| O(7)-H(22) str. (ChCl)          | 3584                    | O(26)-H(42) str. (CA)                                        | 3672 |
| O(23)-H(40) Str. (CA)           | 3606                    | C(7)-H <sub>3</sub> sym. Str.                                | 2922 |
| O(26)-H(42) str. (CA)           | 3670                    | C(4)-H <sub>2</sub> asy. Str.                                | 2963 |
| O(24)-H(41) str. (CA)           | 3682                    |                                                              |      |
